# Supplementary material
Source: HighWire-hosted journal article supplement (https://drc.bmj.com/content/10/2/e002714)
Supplement: inline-supplementary-material-1 [file inline-supplementary-material-1.pdf]

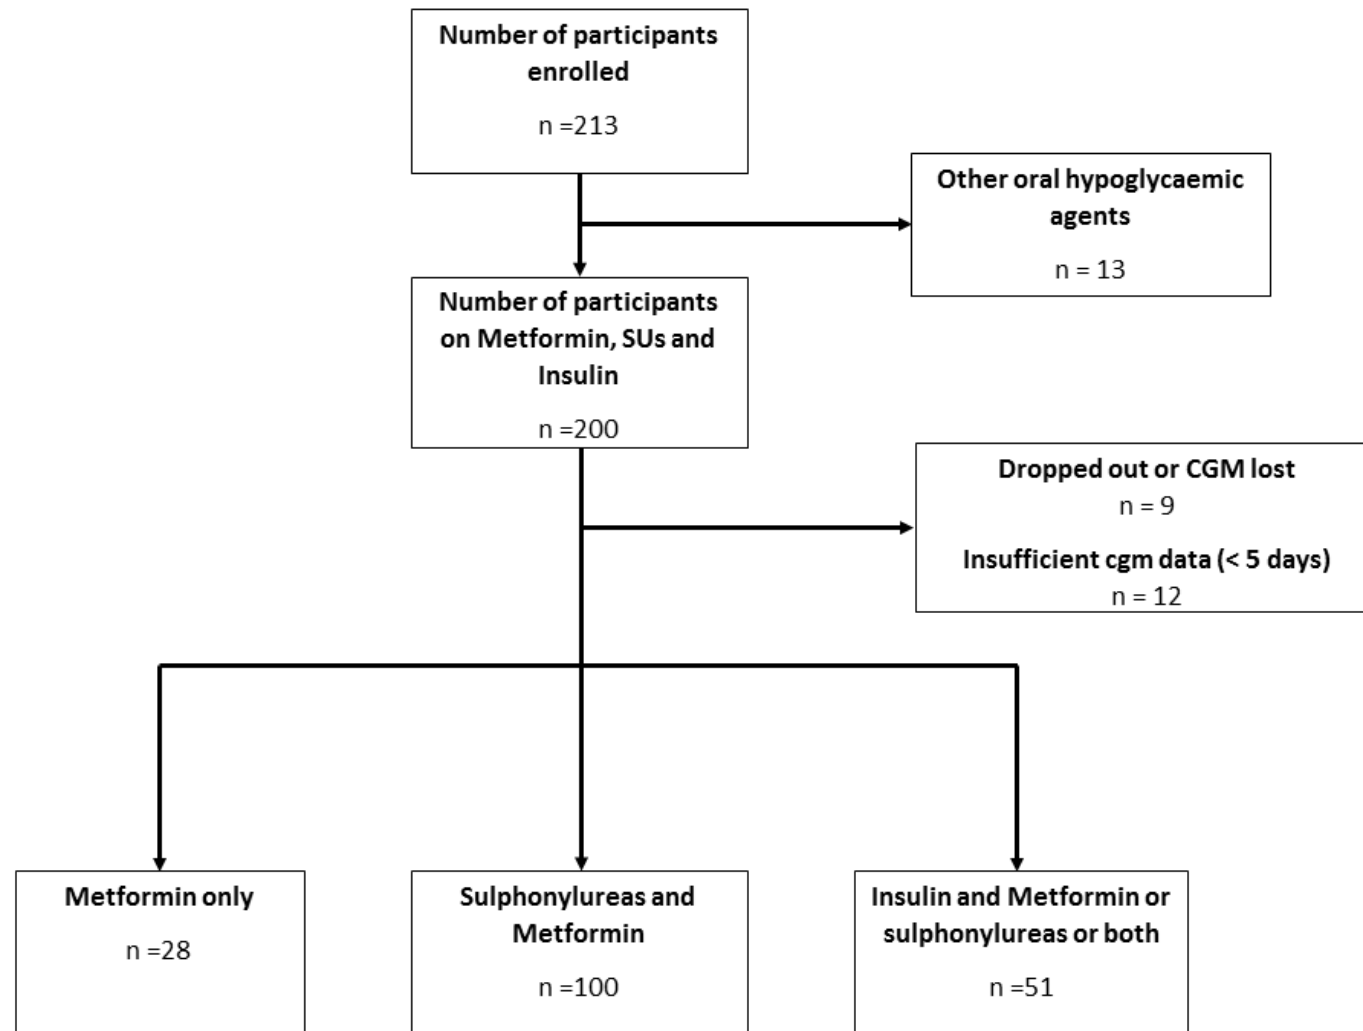

Supplementary figure 1: Participant flow chart

## Supplementary Table 1: Percentage of time below 3 mmol/L per week stratified by type of medication and glycaemia control

|                                     | Metformin           |                      | SUs                  |                      | Insulin               |                      |
|-------------------------------------|---------------------|----------------------|----------------------|----------------------|-----------------------|----------------------|
| <b>HbA1c (mmol/mol)</b>             | HbA1c < 53          | HbA1c ≥ 53           | HbA1c < 53           | HbA1c ≥ 53           | HbA1c < 53            | HbA1c ≥ 7.0 %        |
| Percentage time < 3 mmol/L per week | 1.42<br>(0.15, 1.8) | 0.00<br>(0.00, 0.52) | 2.34<br>(0.60, 4.49) | 0.00<br>(0.00, 0.92) | 5.61<br>(0.34, 13.80) | 1.27<br>(0.00, 5.75) |
| <b>FPG (mmol/L)</b>                 | FPG < 7.0           | FPG ≥ 7.0            | FPG < 7.0            | FPG ≥ 7.0            | FPG < 7.0             | FPG ≥ 7.0            |
| Percentage time < 3 mmol/L per week | 1.42<br>(0.15, 1.8) | 0.15<br>(0.00, 1.68) | 2.40<br>(0.60, 4.98) | 0.00<br>(0.00, 0.46) | 6.52<br>(1.24, 13.50) | 0.67<br>(0.00, 3.44) |

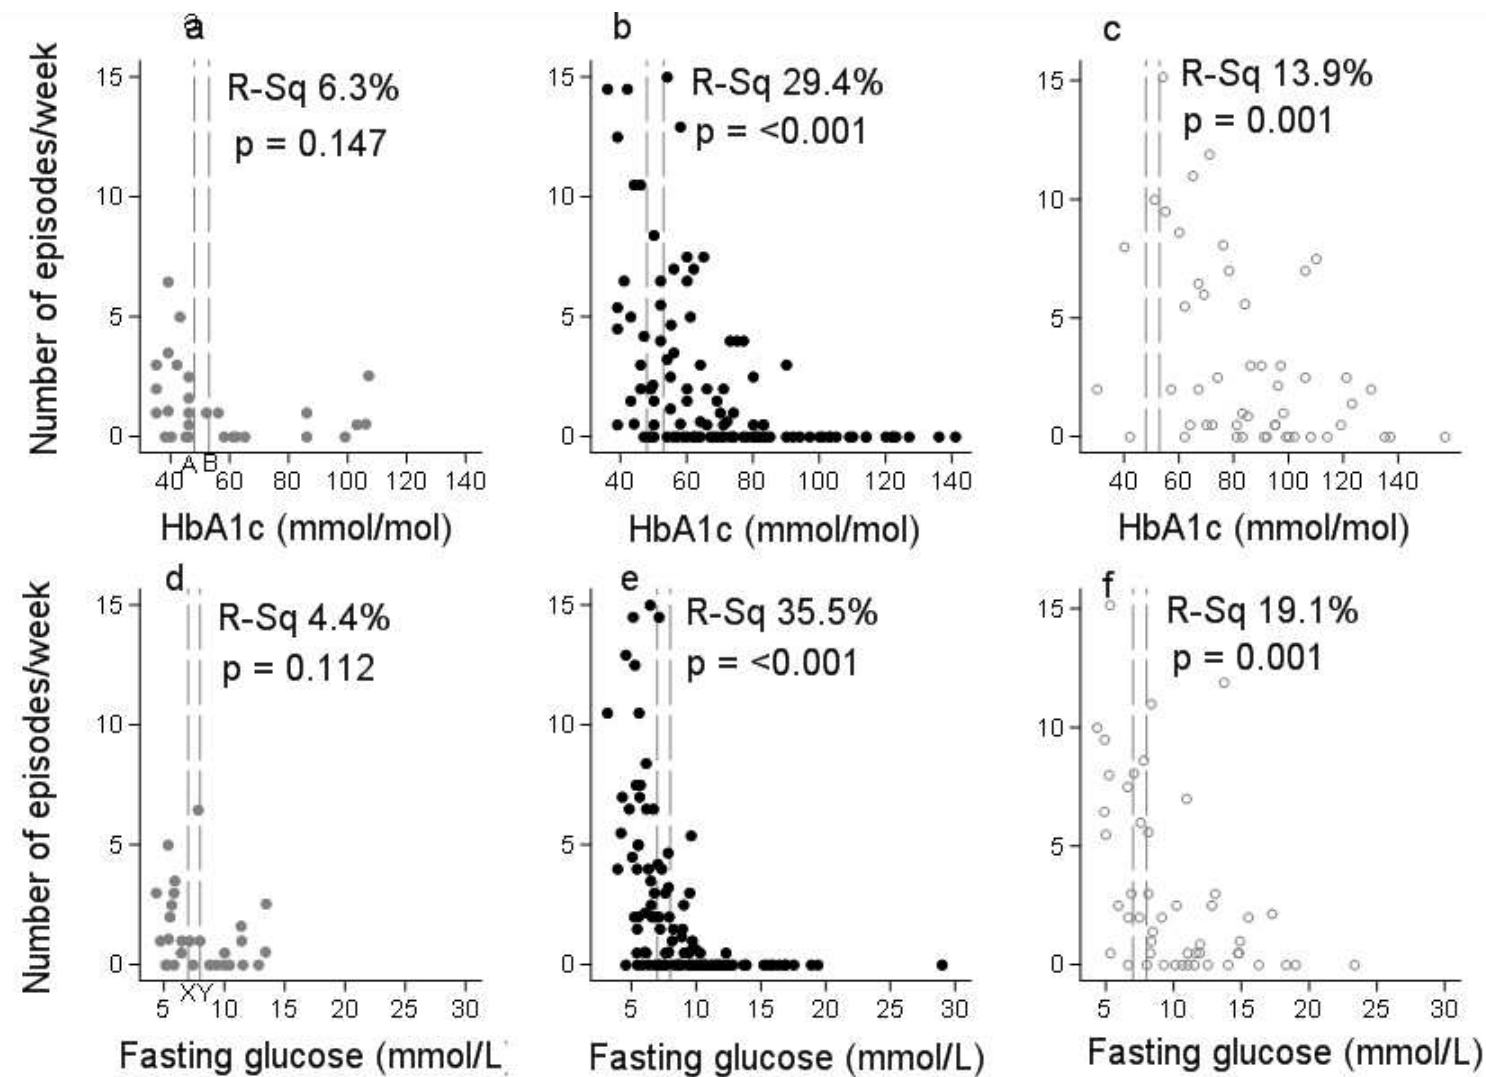

Supplementary figure 2: Comparison of HbA1c and Hypoglycaemia rates and duration per week.

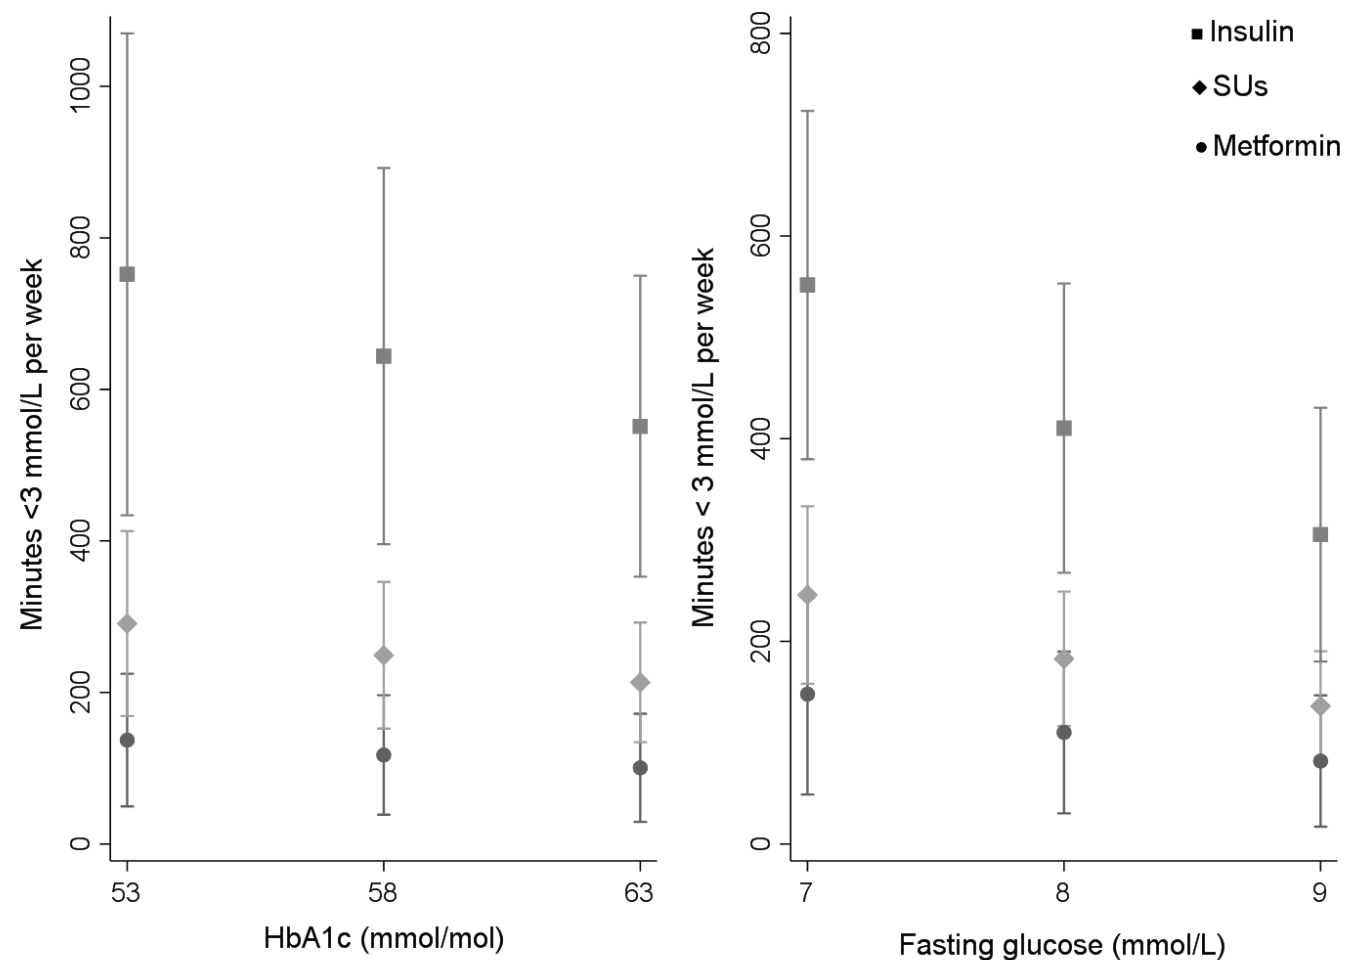

**Supplementary figure 3: Estimated number of minutes below 3 mmol/L per week at different HbA1c and fasting plasma glucose levels. The error bars denote 95% confidence intervals.**

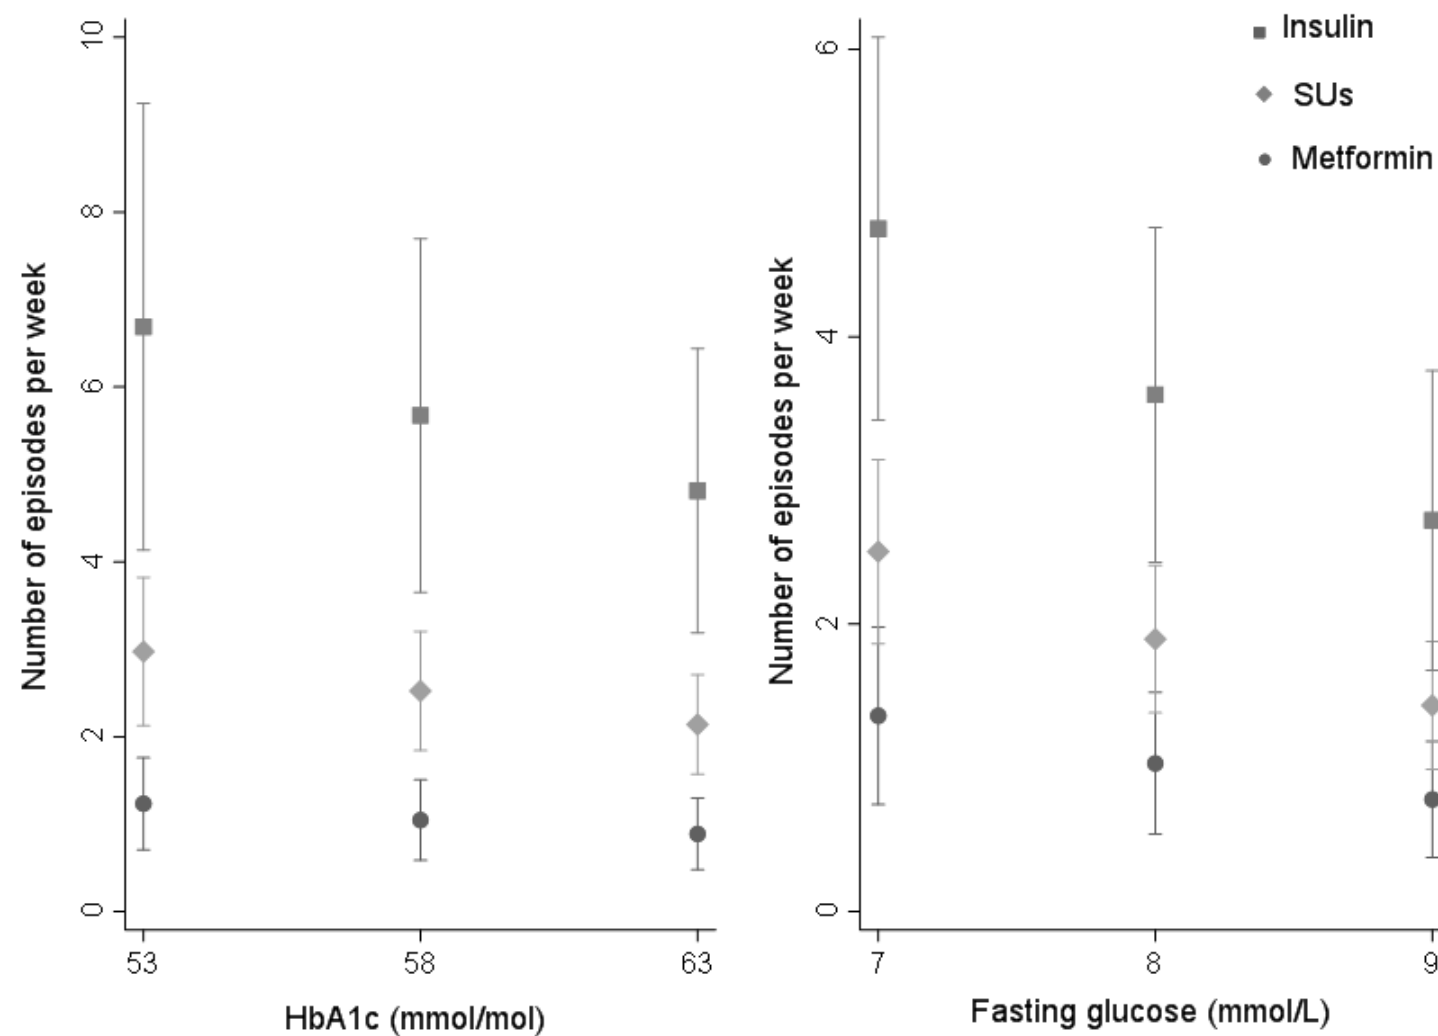

**Supplementary figure 4: Estimated number of minutes below 3 mmol/L per week at different HbA1c and fasting plasma glucose levels. The error bars denote 95% confidence intervals.**
